# Supplementary material for: A Reversal of the Association between Education Level and Obesity Risk during Ageing: A Gender-Specific Longitudinal Study in South Korea
Source: MDPI journal article supplement (doi:10.3390/ijerph17186755), 2020-09-16
Supplement: s1 [file s1]

Supplementary Table S1. Sample characteristics at waves 2 to 6 by gender.

| Characteristics                         | Men              |                  |                  |                  |                  | Women            |                  |                  |                  |                  |
|-----------------------------------------|------------------|------------------|------------------|------------------|------------------|------------------|------------------|------------------|------------------|------------------|
|                                         | Wave 2<br>(2008) | Wave 3<br>(2010) | Wave 4<br>(2012) | Wave 5<br>(2014) | Wave 6<br>(2016) | Wave 2<br>(2008) | Wave 3<br>(2010) | Wave 4<br>(2012) | Wave 5<br>(2014) | Wave 6<br>(2016) |
| Body mass index: Mean (SD) <sup>a</sup> | 23.1 (2.6)       | 23.1 (2.6)       | 23.1 (2.6)       | 23.1 (2.6)       | 23.2 (2.5)       | 23.2 (2.9)       | 23.3 (2.9)       | 23.3 (2.9)       | 23.3 (2.9)       | 23.4 (2.9)       |
| Age, years: Mean (SD) <sup>a</sup>      | 63.1 (10.3)      | 64.7 (10.0)      | 66.4 (9.6)       | 67.9 (9.4)       | 70.5 (9.1)       | 63.7 (11.2)      | 65.3 (10.9)      | 66.8 (10.4)      | 68.4 (10.1)      | 70.8 (9.8)       |
| 45-54                                   | 26.0%            | 19.2%            | 12.7%            | 6.5%             | 0.0%             | 26.7%            | 20.6%            | 14.2%            | 7.4%             | 0.0%             |
| 55-64                                   | 28.7%            | 29.8%            | 31.8%            | 32.6%            | 33.5%            | 26.6%            | 28.8%            | 31.1%            | 32.7%            | 31.7%            |
| 65-74                                   | 29.5%            | 31.2%            | 32.1%            | 33.2%            | 34.2%            | 28.1%            | 29.1%            | 29.9%            | 30.3%            | 31.4%            |
| 75-84                                   | 12.6%            | 15.1%            | 19.4%            | 22.5%            | 27.9%            | 14.8%            | 16.8%            | 19.8%            | 23.1%            | 27.4%            |
| 85 and above                            | 2.1%             | 2.7%             | 3.3%             | 4.3%             | 7.3%             | 3.8%             | 4.7%             | 5.0%             | 6.5%             | 9.5%             |
| Non-married <sup>b</sup>                | 8.6%             | 8.8%             | 9.1%             | 9.3%             | 9.5%             | 32.4%            | 33.2%            | 33.1%            | 34.5%            | 35.8%            |
| Resides in rural area                   | 24.5%            | 25.3%            | 25.9%            | 26.0%            | 26.0%            | 24.3%            | 25.5%            | 26.1%            | 26.8%            | 27.1%            |
| Religion, yes                           | 40.5%            | 38.9%            | 39.9%            | 33.3%            | 33.2%            | 58.8%            | 56.5%            | 59.0%            | 51.2%            | 48.9%            |
| Education level                         |                  |                  |                  |                  |                  |                  |                  |                  |                  |                  |
| Elementary school or less               | 31.8%            | 31.2%            | 30.4%            | 29.6%            | 28.2%            | 58.2%            | 57.9%            | 56.8%            | 56.6%            | 55.4%            |
| Middle/high school                      | 51.2%            | 52.0%            | 52.3%            | 52.9%            | 56.2%            | 37.4%            | 37.6%            | 38.7%            | 38.9%            | 40.7%            |
| College or higher                       | 17.0%            | 16.9%            | 17.4%            | 17.5%            | 15.6%            | 4.4%             | 4.5%             | 4.5%             | 4.5%             | 3.9%             |
| Occupation                              |                  |                  |                  |                  |                  |                  |                  |                  |                  |                  |
| No job                                  | 44.6%            | 43.8%            | 48.3%            | 51.3%            | 53.4%            | 71.8%            | 70.6%            | 72.9%            | 74.6%            | 75.9%            |
| Blue collar job                         | 41.6%            | 43.7%            | 40.4%            | 38.6%            | 37.8%            | 25.0%            | 26.0%            | 24.1%            | 22.9%            | 21.9%            |
| White collar job                        | 13.8%            | 12.5%            | 11.3%            | 10.1%            | 8.9%             | 3.2%             | 3.4%             | 3.0%             | 2.5%             | 2.2%             |
| Household income <sup>c</sup>           |                  |                  |                  |                  |                  |                  |                  |                  |                  |                  |
| Lower half                              | 46.6%            | 46.8%            | 46.3%            | 46.2%            | 48.4%            | 52.0%            | 52.0%            | 52.4%            | 52.1%            | 54.3%            |
| Higher half                             | 52.1%            | 52.7%            | 53.3%            | 53.1%            | 51.5%            | 46.0%            | 47.3%            | 47.0%            | 46.8%            | 45.4%            |
| Unreported                              | 1.4%             | 0.5%             | 0.4%             | 0.7%             | 0.1%             | 2.1%             | 0.7%             | 0.6%             | 1.2%             | 0.3%             |
| House renter                            | 17.9%            | 17.3%            | 16.7%            | 15.7%            | 15.1%            | 19.6%            | 19.0%            | 18.0%            | 17.1%            | 16.4%            |
| Smoking, yes                            | 37.6%            | 36.3%            | 33.8%            | 27.6%            | 22.0%            | 3.2%             | 2.8%             | 2.5%             | 1.9%             | 1.6%             |
| Alcohol intake, yes                     | 60.3%            | 58.0%            | 56.1%            | 55.1%            | 53.7%            | 18.4%            | 18.0%            | 17.6%            | 16.0%            | 15.4%            |
| Routine physical exercise, active       | 39.5%            | 37.9%            | 41.3%            | 36.8%            | 39.4%            | 33.0%            | 30.5%            | 32.1%            | 29.2%            | 30.5%            |
| Obese <sup>d</sup> , yes                | 18.8%            | 19.8%            | 20.9%            | 20.2%            | 21.2%            | 23.8%            | 25.2%            | 25.2%            | 25.9%            | 26.6%            |
| Depressive symptom <sup>e</sup> , yes   | 40.4%            | 41.2%            | 40.4%            | 37.5%            | 34.6%            | 52.2%            | 49.8%            | 46.4%            | 44.6%            | 41.5%            |
| Chronic disease <sup>f</sup> , yes      | 44.9%            | 49.3%            | 53.5%            | 56.5%            | 59.3%            | 45.3%            | 51.2%            | 55.0%            | 58.7%            | 61.1%            |
| Number of observations                  | 3,711            | 3,281            | 2,983            | 2,777            | 2,556            | 4,791            | 4,289            | 3,882            | 3,688            | 3,442            |

<sup>a</sup> SD denotes standard deviation. <sup>b</sup> Nonmarried includes never married, separated, widowed, or divorced. <sup>c</sup> Household income was adjusted for household size for each wave. <sup>d</sup> Obese was defined as the body mass index of at least 25. <sup>e</sup> Depressive symptom was defined as a score of 4 or more on the 10-item short form of the Center for Epidemiologic Studies Depression Scale. <sup>f</sup> Chronic diseases include hypertension, diabetes, stroke, angina, myocardial infarction, chronic pulmonary diseases, and any type of cancer.

**Supplementary Table S2. Changes in the obesity status between waves by gender (the number of participants and percentage).**

| Men              |               |                   |                  |                   | Women            |                |                   |                |                   |                  |                   |
|------------------|---------------|-------------------|------------------|-------------------|------------------|----------------|-------------------|----------------|-------------------|------------------|-------------------|
| Wave 1           | Not obese     | Wave 2            |                  |                   | Wave 1           | Not obese      | Wave 2            |                |                   |                  |                   |
|                  |               | Not obese         | Obese            | Total             |                  |                | Not obese         | Obese          | Total             |                  |                   |
|                  |               | 2,704<br>(93.9%)  | 177<br>(6.1%)    | 2,881<br>(100.0%) |                  |                | 3,225<br>(91.2%)  | 311<br>(8.8%)  | 3,536<br>(100.0%) |                  |                   |
| Wave 1           | Obese         | 275<br>(34.6%)    | 520<br>(65.4%)   | 795<br>(100.0%)   | Wave 1           | Obese          | 337<br>(29.5%)    | 805<br>(70.5%) | 1,142<br>(100.0%) |                  |                   |
|                  |               | Total             | 2,979<br>(81.0%) | 697<br>(19.0%)    |                  |                | 3,676<br>(100.0%) | Total          | 3,562<br>(76.1%)  | 1,116<br>(23.9%) | 4,678<br>(100.0%) |
|                  |               |                   | Wave 3           | Not obese         |                  |                | Wave 3            |                |                   | Wave 2           | Obese             |
| Not obese        | Obese         |                   |                  |                   | Total            | Not obese      | Obese             |                | Total             |                  |                   |
| 2,421<br>(91.8%) | 216<br>(8.2%) | 2,637<br>(100.0%) |                  |                   | 2,869<br>(89.8%) | 327<br>(10.2%) | 3,196<br>(100.0%) |                |                   |                  |                   |
| Wave 2           | Obese         | 188<br>(30.3%)    | 432<br>(69.7%)   | 620<br>(100.0%)   | Wave 2           | Obese          | 285<br>(27.7%)    | 744<br>(72.3%) | 1,029<br>(100.0%) |                  |                   |
|                  |               | Total             | 2,609<br>(80.1%) | 648<br>(19.9%)    |                  |                | 3,257<br>(100.0%) | Total          | 3,154<br>(74.7%)  | 1,071<br>(25.4%) | 4,225<br>(100.0%) |
|                  |               |                   | Wave 4           | Not obese         |                  |                | Wave 4            |                |                   | Wave 3           | Obese             |
| Not obese        | Obese         |                   |                  |                   | Total            | Not obese      | Obese             |                | Total             |                  |                   |
| 2,226<br>(94.7%) | 125<br>(5.3%) | 2,351<br>(100.0%) |                  |                   | 2,679<br>(94.5%) | 155<br>(5.5%)  | 2,834<br>(100.0%) |                |                   |                  |                   |
| Wave 3           | Obese         | 109<br>(18.2%)    | 490<br>(81.8%)   | 599<br>(100.0%)   | Wave 3           | Obese          | 173<br>(17.6%)    | 808<br>(82.4%) | 981<br>(100.0%)   |                  |                   |
|                  |               | Total             | 2,335<br>(79.2%) | 615<br>(20.9%)    |                  |                | 2,950<br>(100.0%) | Total          | 2,852<br>(74.8%)  | 963<br>(25.2%)   | 3,815<br>(100.0%) |
|                  |               |                   | Wave 5           | Not obese         |                  |                | Wave 5            |                |                   | Wave 4           | Obese             |
| Not obese        | Obese         |                   |                  |                   | Total            | Not obese      | Obese             |                | Total             |                  |                   |
| 2,105<br>(97.1%) | 64<br>(3.0%)  | 2,169<br>(100.0%) |                  |                   | 2,578<br>(95.3%) | 126<br>(4.7%)  | 2,704<br>(100.0%) |                |                   |                  |                   |
| Wave 4           | Obese         | 87<br>(15.0%)     | 495<br>(85.1%)   | 582<br>(100.0%)   | Wave 4           | Obese          | 107<br>(11.5%)    | 820<br>(88.5%) | 927<br>(100.0%)   |                  |                   |
|                  |               | Total             | 2,192<br>(79.7%) | 559<br>(20.3%)    |                  |                | 2,751<br>(100.0%) | Total          | 2,685<br>(74.0%)  | 946<br>(26.1%)   | 3,631<br>(100.0%) |
|                  |               |                   | Wave 6           | Not obese         |                  |                | Wave 6            |                |                   | Wave 5           | Obese             |
| Not obese        | Obese         |                   |                  |                   | Total            | Not obese      | Obese             |                | Total             |                  |                   |
| 1,918<br>(94.9%) | 104<br>(5.1%) | 2,022<br>(100.0%) |                  |                   | 2,367<br>(93.7%) | 159<br>(6.3%)  | 2,526<br>(100.0%) |                |                   |                  |                   |
| Wave 5           | Obese         | 90<br>(17.1%)     | 435<br>(82.9%)   | 525<br>(100.0%)   | Wave 5           | Obese          | 149<br>(16.5%)    | 752<br>(83.5%) | 901<br>(100.0%)   |                  |                   |
|                  |               | Total             | 2,008<br>(78.8%) | 539<br>(21.2%)    |                  |                | 2,547<br>(100.0%) | Total          | 2,516<br>(73.4%)  | 911<br>(26.6%)   | 3,427<br>(100.0%) |
